# Supplementary material
Source: ML conference proceedings conference paper supplement (https://openreview.net/forum?id=pF2ukh7HxA)
Supplement: supplementary_material [file attachment]

## Sheet: MatMul Bandwidth
	Bandwidth Limits
	FLOPs		Kt	989400000000000	ops/s
	Quantization (bytes/value)		q	2	B/value
	L2 Level			This corresponds to the caching level
	Bandwidth (bytes)			3350000000000	B/s
	Bandwidth (values)		Ht_L2	1675000000000	values/s
	Computes/Transfer		Kt/Ht	590.687
	Absolute Min L2 Memory		q(Kt/Ht)^2	681.466	KB
	Absolute Min b		(Kt/Ht)/2	295.343	values
	N_SM per L2		N_SM	66
	Memory/Processor		M_SM N_SM	16896	KB
	Tile Size		(M/q)^0.5	2941.22	values
	Min b		(Ht/Kt-(M/q)^-0.5)^-1/2	369.563	values
	SMEM Level			This corresponds to the lower level
	Bandwidth (bytes)			12000000000000	B/s
	Bandwidth (values)		Ht_SM	6000000000000	values/s
	Computes/Transfer		Kt/Ht	164.9
	Absolute Min L2 Memory		q(Kt/Ht)^2	53.1094	KB
	Absolute Min b		(Kt/Ht)/2	82.45	values
	Memory/Processor		M_SM	256	KB
	Tile Size		(M/q)^0.5	362.039	values
	Min b		(Ht/Kt-(M/q)^-0.5)^-1/2	151.417	values

## Sheet: Configuration
	Values in buff are user configured.			Axis Multiples					TRUE
	Values in green are from GPU specifications.			Per Thread Register Limit					TRUE
	Values in grey are automatically calculated.			Thread Block Memory Limit					TRUE
	Other values are from diagrams.			Thread Count < 1024					TRUE
Table 1: Configuration Table for Hopper Attention			Partitions (per g_q)									Extra Loaded	Replacement	Quantization (B)	Per Thread Block	Per Warpgroup			Number of Warpgroups Configuration
																			N =	3	g_q =	384
	Variables	Level	g	w	t	s	u	d	d'	d''	Multiple	Loaded					Storage
	Divisors		128	128	128	32	8	128	16	1									Table 2: Maximum Analysis											Table 4: Throughput Analysis
	Axis Sizes		128	128	128	64	64	128	32	8														Excess Calculations									H100 SXM5	H100 PCIe	Unit
Q	Queries	Tensor Core		1				1						1		16384	SMEM			Maximum per TB.	Per TB.	Per WG.	N_max	Per TB.	Per WG.	Per Th.				Clk/Th		k	6	6
K	Keys	Tensor Core				1		1				1		1	16384		SMEM		SMEM	227	48	48	3.72917	35	11.6667					H/TB		H	24576	24576	B
V	Values	Tensor Core				1		1				1		2	32768		SMEM		Registers	256	0	74.75	3.42475	31.75	10.5833	84.6667				Clk/s		f_K	1830000000	1620000000	Hz
S	Attention Scores	Tensor Core		1		1								2		16384	Registers		Sources	Under CUDA-Enabled Datacenter Products, Hopper has CC 9.0										Bandwidth		B	3352000000000	2039000000000	B/s
P	Weighted Scores	SMEM	1			1								2		16384	SMEM			Technical Specifications per Compute Capability										Num. of SMs		N_SM	132	114
P'	Weighted Scores (Registers)	Registers			1		1							2		16384	Registers		Table 3: Compute Analysis											Bandwidth / SM		B / N_SM	2.53939e+10	1.7886e+10	B/s
A	Weighted Scores (Tensor Core)	Tensor Core		1					1					2		8192	SMEM				Q-K	SoftMax	P-V	MADD		Totals				Load Time		T_H = H N_SM / B	9.6779e-07	1.37404e-06	s
𝛼	Auxiliary	Registers			1						3			2		768	Registers		Core Type		Tensor Core	Special Function Unit	Tensor Core	FP16		Tensor Core	Special Function Unit	FP16		Min. Th		g*_q = T_H f_K / k	295.176	370.99
O'	Output (Registers)	Registers			1			1						2		32768	Registers													Num. of Th		g_q	384	384
D	Delta Output (Tensor Core)	Tensor Core		1					1					2		8192	Registers		Ops/Th		2 d s_x	s_x + s_x/u_x	2 d s_x	2 d s_x / u_x						Comp Time		T_K = k * g_q / f_K	1.25902e-06	1.42222e-06	s
𝛥O	Delta Output (SMEM)	SMEM	1						1					2		8192	SMEM		From table		16384	65	16384	256		32768	65	256		Time		T = max(T_K, T_H)	1.25902e-06	1.42222e-06
𝛥O'	Delta Output (Registers)	Registers			1					1				2		2048	Registers		Ops/Clk		8192	16	4096	512		5461.33	16	512		Ops/loop		K = g_q * (K / g_q)	12582912	12582912	FLOP
	Total (Bytes)														49152	49152	SMEM		Clks/Th		2	4.0625	4	0.5		6	4.0625	0.5		Throughput		K * N_SM / T	1319239680000000	1.0086e+15	FLOP/s
															0	76544	Registers		Sources	Table , p39. (Ops/clk) = (FLOPs)/(N_SM*f_K)										Sources	Table, p39
																				CUDA Programming Guide, Arithmetic Instructions

## Sheet: FlashAttention FP8 (Inter)
	Values in buff are user configured.			Axis Multiples					TRUE
	Values in green are from GPU specifications.			Per Thread Register Limit					TRUE
	Values in grey are automatically calculated.			Thread Block Memory Limit					TRUE
	Other values are from diagrams.			Thread Count < 1024					TRUE
Table 1: Configuration Table for Hopper Attention			Partitions (per g_q)						Extra Loaded	Replacement	Quantization (B)	Per Thread Block	Per Warpgroup			Number of Warpgroups Configuration
																N =	2	g_q =	256
	Variables	Level	g	w	t	s	d	Multiple	Loaded					Storage
	Divisors		128	1	1	32	128									Table 2: Maximum Analysis											Table 4: Throughput Analysis
	Axis Sizes		128	1	1	224	128														Excess Calculations									H100 SXM5	H100 PCIe	Unit
Q	Queries	Tensor Core	1				1				1		16384	Registers			Maximum per TB.	Per TB.	Per WG.	N_max	Per TB.	Per WG.	Per Th.				Clk/Th		k	14	14
K	Keys	Tensor Core				1	1		1		1	57344		SMEM		SMEM	227	112	0	#DIV/0!	115	57.5					H/TB		H	57344	57344	B
V	Values	Tensor Core				1	1		1		1	57344		SMEM		Registers	256	0	88.75	2.88451	78.5	39.25	314				Clk/s		f_K	1830000000	1620000000	Hz
S	Scores / Weights	Tensor Core	1			1					2		57344	Registers		Sources	Under CUDA-Enabled Datacenter Products, Hopper has CC 9.0										Bandwidth		B	3352000000000	2039000000000	B/s
O	Output	Tensor Core	1				1				1		16384	Registers			Technical Specifications per Compute Capability										Num. of SMs		N_SM	132	114
𝛼	Auxiliary	Registers	1					3			2		768	Registers		Table 3: Compute Analysis											Bandwidth / SM		B / N_SM	2.53939e+10	1.7886e+10	B/s
	Total (Bytes)											114688	0	SMEM				Q-K	SoftMax	P-V			Totals				Load Time		T_H = H N_SM / B	2.25818e-06	3.20609e-06	s
												0	90880	Registers		Core Type		Tensor Core	Special Function Unit	Tensor Core			Tensor Core	Special Function Unit			Min. Th		g*_q = T_H f_K / k	295.176	370.99
												Excess Registers per Thread	314														Num. of Th		g_q	999	999
	Sources for tile sizes:															Ops/Th		2 d s_x	s_x	2 d s_x							Comp Time		T_K = k * g_q / f_K	7.64262e-06	8.63333e-06	s
	https://github.com/Dao-AILab/flash-attention/blob/22c0358f4ba7999a15dbe27989ce163e5edb5693/hopper/tile_size.h#L10															From table		57344	224	57344			114688	224			Time		T = max(T_K, T_H)	7.64262e-06	8.63333e-06
	The current implementation of FlashAttention seems to always use intra-warpgroup strategies, however.															Ops/Clk		8192	16	8192			8192	16			Ops/loop		K = g_q * (K / g_q)	114573312	114573312	FLOP
																Clks/Th		7	14	7			14	14			Throughput		K * N_SM / T	1.97886e+15	1.5129e+15	FLOP/s
																Sources	Table , p39. (Ops/clk) = (FLOPs)/(N_SM*f_K)										Sources	Table, p39
																	CUDA Programming Guide, Arithmetic Instructions

## Sheet: FlashAttention FP8 (Intra)
	Values in buff are user configured.			Axis Multiples					TRUE
	Values in green are from GPU specifications.			Per Thread Register Limit					FALSE
	Values in grey are automatically calculated.			Thread Block Memory Limit					TRUE
	Other values are from diagrams.			Thread Count < 1024					TRUE
Table 1: Configuration Table for Hopper Attention			Partitions (per g_q)						Extra Loaded	Replacement	Quantization (B)	Per Thread Block	Per Warpgroup			Number of Warpgroups Configuration
																N =	1	g_q =	128
	Variables	Level	g			s	d	Multiple	Loaded					Storage
	Divisors		128	1	1	32	128									Table 2: Maximum Analysis											Table 4: Throughput Analysis
	Axis Sizes		128	1	1	192	128														Excess Calculations									H100 SXM5	H100 PCIe	Unit
Q	Queries	Tensor Core	1				1				1		16384	Registers			Maximum per TB.	Per TB.	Per WG.	N_max	Per TB.	Per WG.	Per Th.				Clk/Th		k	24	24
K	Keys	Tensor Core				1	1		1		1	49152		SMEM		SMEM	227	96	0	#DIV/0!	131	131					H/TB		H	49152	49152	B
V	Values	Tensor Core				1	1		1		1	49152		SMEM		Registers	256	0	128.75	1.98835	127.25	127.25	1018				Clk/s		f_K	1830000000	1620000000	Hz
S	Scores / Weights	Tensor Core	1			1			1		2		98304	Registers		Sources	Under CUDA-Enabled Datacenter Products, Hopper has CC 9.0										Bandwidth		B	3352000000000	2039000000000	B/s
O	Output	Tensor Core	1				1				1		16384	Registers			Technical Specifications per Compute Capability										Num. of SMs		N_SM	132	114
𝛼	Auxiliary	Registers	1					3			2		768	Registers		Table 3: Compute Analysis											Bandwidth / SM		B / N_SM	2.53939e+10	1.7886e+10	B/s
	Total (Bytes)											98304	0	SMEM				Q-K	SoftMax	P-V			Totals				Load Time		T_H = H N_SM / B	1.93558e-06	2.74808e-06	s
												0	131840	Registers		Core Type		Tensor Core	Special Function Unit	Tensor Core			Tensor Core	Special Function Unit			Min. Th		g*_q = T_H f_K / k	147.588	185.495
												Excess Registers per Thread	-6														Num. of Th		g_q	999	999
	Sources for tile sizes:															Ops/Th		2 d s_x	s_x	2 d s_x							Comp Time		T_K = k * g_q / f_K	1.31016e-05	1.48e-05	s
	https://github.com/Dao-AILab/flash-attention/blob/22c0358f4ba7999a15dbe27989ce163e5edb5693/hopper/tile_size.h#L10															From table		49152	192	49152			98304	192			Time		T = max(T_K, T_H)	1.31016e-05	1.48e-05
																Ops/Clk		4096	16	4096			4096	16			Ops/loop		K = g_q * (K / g_q)	98205696	98205696	FLOP
																Clks/Th		12	12	12			24	12			Throughput		K * N_SM / T	989429760000000	756449280000000	FLOP/s
																Sources	Table , p39. (Ops/clk) = (FLOPs)/(N_SM*f_K)										Sources	Table, p39
																	CUDA Programming Guide, Arithmetic Instructions

## Sheet: FlashAttention FP16
	Values in buff are user configured.			Axis Multiples					TRUE
	Values in green are from GPU specifications.			Per Thread Register Limit					FALSE
	Values in grey are automatically calculated.			Thread Block Memory Limit					TRUE
	Other values are from diagrams.			Thread Count < 1024					TRUE
Table 1: Configuration Table for Hopper Attention			Partitions (per g_q)						Extra Loaded	Replacement	Quantization (B)	Per Thread Block	Per Warpgroup			Number of Warpgroups Configuration
																N =	1	g_q =	128
	Variables	Level	g			s	d	Multiple	Loaded					Storage
	Divisors		128	1	1	32	128									Table 2: Maximum Analysis											Table 4: Throughput Analysis
	Axis Sizes		128	1	1	128	128														Excess Calculations									H100 SXM5	H100 PCIe	Unit
Q	Queries	Tensor Core	1				1				2		32768	Registers			Maximum per TB.	Per TB.	Per WG.	N_max	Per TB.	Per WG.	Per Th.				Clk/Th		k	16	16
K	Keys	Tensor Core				1	1		1		2	65536		SMEM		SMEM	227	128	0	#DIV/0!	99	99					H/TB		H	65536	65536	B
V	Values	Tensor Core				1	1		1		2	65536		SMEM		Registers	256	0	129.5	1.97683	126.5	126.5	1012				Clk/s		f_K	1830000000	1620000000	Hz
S	Scores / Weights	Tensor Core	1			1			1		2		65536	Registers		Sources	Under CUDA-Enabled Datacenter Products, Hopper has CC 9.0										Bandwidth		B	3352000000000	2039000000000	B/s
O	Output	Tensor Core	1				1				2		32768	Registers			Technical Specifications per Compute Capability										Num. of SMs		N_SM	132	114
𝛼	Auxiliary	Registers	1					3			4		1536	Registers		Table 3: Compute Analysis											Bandwidth / SM		B / N_SM	2.53939e+10	1.7886e+10	B/s
	Total (Bytes)											131072	0	SMEM				Q-K	SoftMax	P-V			Totals				Load Time		T_H = H N_SM / B	2.58077e-06	3.6641e-06	s
												0	132608	Registers		Core Type		Tensor Core	Special Function Unit	Tensor Core			Tensor Core	Special Function Unit			Min. Th		g*_q = T_H f_K / k	295.176	370.99
												Excess Registers per Thread	-12														Num. of Th		g_q	999	999
	Sources for tile sizes:															Ops/Th		2 d s_x	s_x	2 d s_x							Comp Time		T_K = k * g_q / f_K	8.73443e-06	9.86667e-06	s
	https://github.com/Dao-AILab/flash-attention/blob/22c0358f4ba7999a15dbe27989ce163e5edb5693/hopper/tile_size.h#L10															From table		32768	128	32768			65536	128			Time		T = max(T_K, T_H)	8.73443e-06	9.86667e-06
																Ops/Clk		4096	16	4096			4096	16			Ops/loop		K = g_q * (K / g_q)	65470464	65470464	FLOP
																Clks/Th		8	8	8			16	8			Throughput		K * N_SM / T	989429760000000	756449280000000	FLOP/s
																Sources	Table , p39. (Ops/clk) = (FLOPs)/(N_SM*f_K)										Sources	Table, p39
																	CUDA Programming Guide, Arithmetic Instructions
